# Supplementary material for: Role of a chalcone isomerase-like protein in flavonoid biosynthesis in Arabidopsis thaliana
Source: PubMed Central journal article supplement (PMC4765788; doi:10.1093/jxb/erv413), 2015-09-07
Supplement: supp_erv413_jexbot150128_file001.pdf [file supp_erv413_jexbot150128_file001.pdf]

## Supporting Information

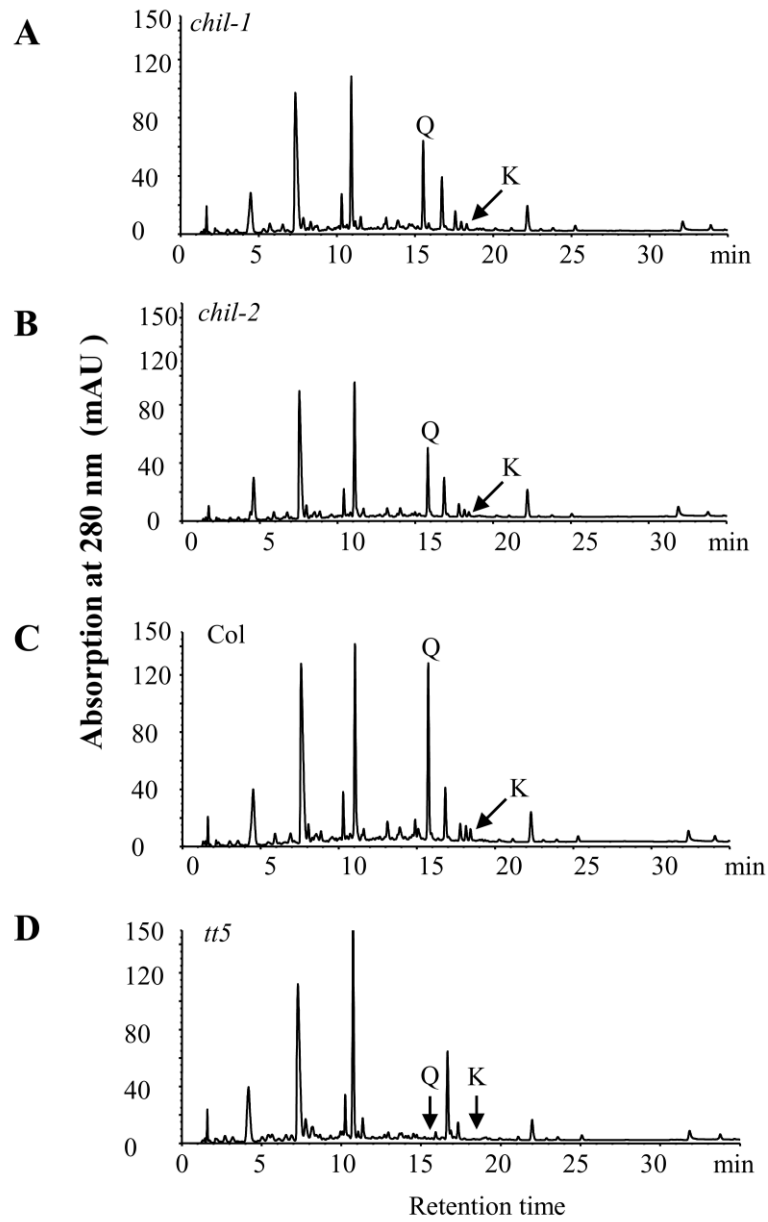

**Figure S1. Representative HPLC chromatograms of the *chil-1* mutants and Col.**  
The chromatograms were obtained from methanolic extracts of mature seeds of *chil-1* (A), *chil-1* (B), Col control (C) and *tt5* (D).

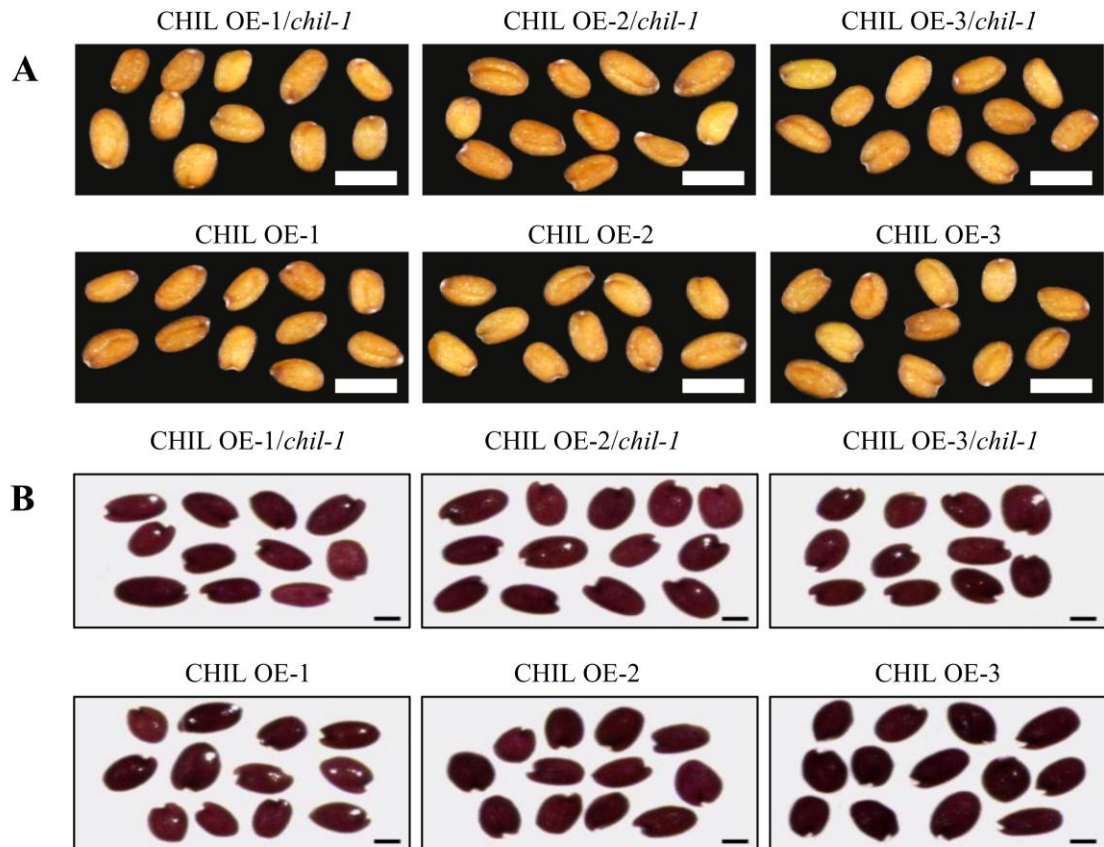

**Figure S2. Over-expression of *CHIL* gene in the *chil-1* mutant and Col background.**

(A) Seed phenotype of the *CHIL* OE-1/*chil-1*, *CHIL* OE-2/*chil-1*, *CHIL* OE-3/*chil-1*, *CHIL* OE-1, *CHIL* OE-2 and *CHIL* OE-3 before staining with DMACA. Bars=0.5 mm.

(B) Seed phenotype of the above mentioned mutant lines after staining with DMACA for 20 days. Bars=0.2 mm.

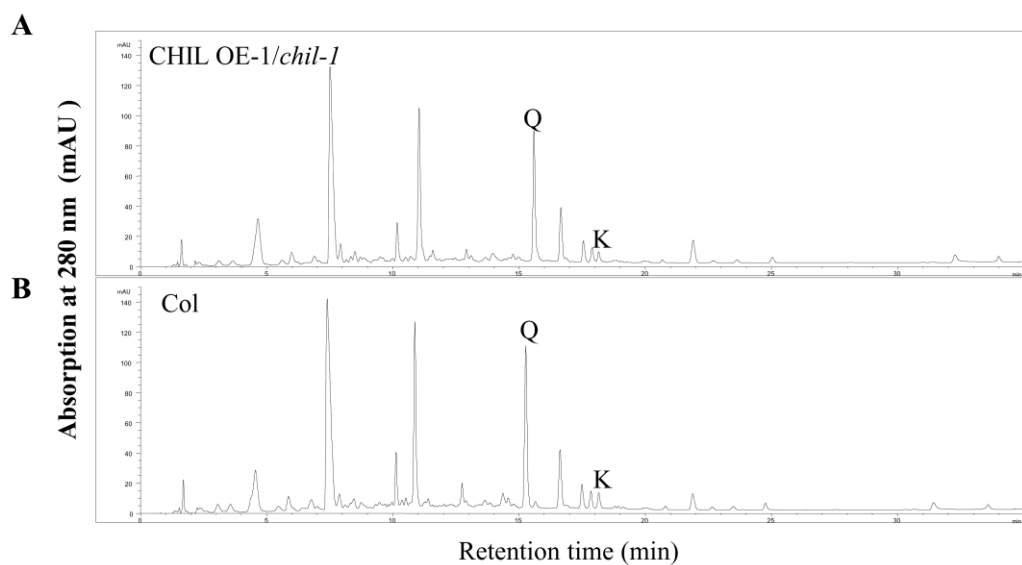

**Figure S3. Representative HPLC chromatograms of the over-expression lines in the *chil-1* mutant and Col background.**

The chromatograms were obtained from methanolic extracts of mature seeds of CHIL OE-1/*chil-1* (A) and wild type control Col (B). The over-expression of *CHIL* gene could complement the *chil* mutant phenotype in flavonol accumulation.

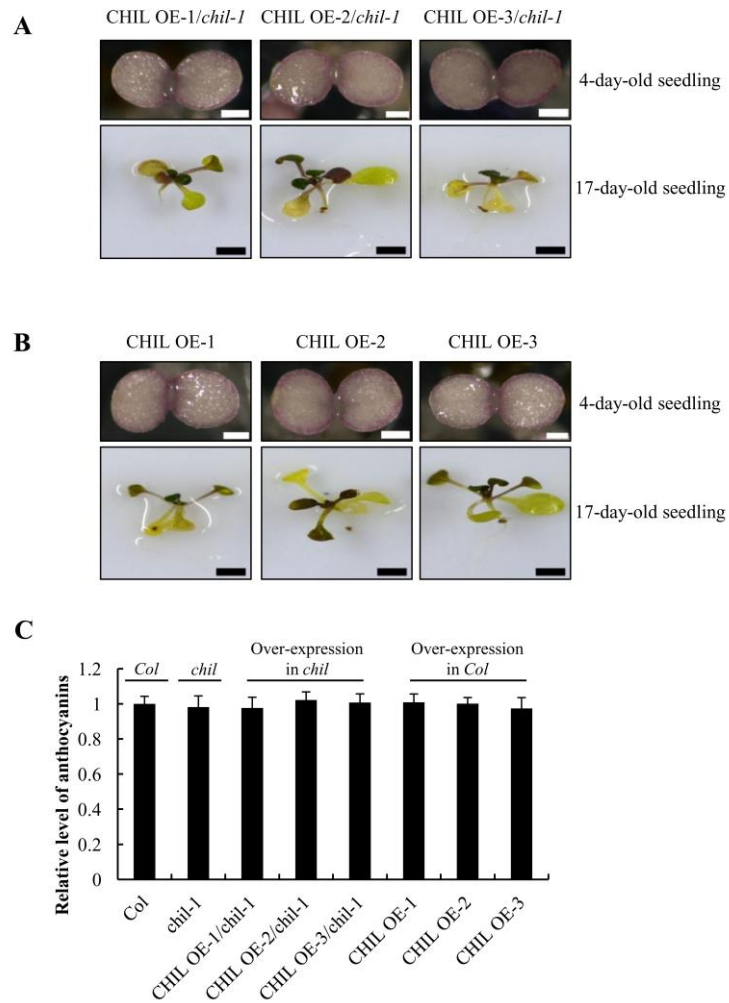

**Figure S4. Anthocyanin accumulation in the *CHIL* over-expression lines in the *chil* and Col background.**

(A) Anthocyanin accumulation in 4-day-old seedlings of *Arabidopsis* (the upper panels, bars=0.5 mm) and 17-day-old seedlings (the bottom panels, bars=5 mm) of CHIL OE-1/*chil-1*, CHIL OE-2/*chil-1* and CHIL OE-3/*chil-1*.

(B) Anthocyanin accumulation in the 4-day-old seedlings of *Arabidopsis* (the upper panels, bars=0.5 mm) and 17-day-old seedlings (the bottom panels, bars=5 mm) of CHIL OE-1, CHIL OE-2 and CHIL OE-3.

(C) Relative level of anthocyanins in the 17-day-old seedlings of Col, *chil-1*, CHIL OE-1/*chil-1*, CHIL OE-2/*chil-1*, CHIL OE-3/*chil-1*, CHIL OE-1, CHIL OE-2 and CHIL OE-3. The level of anthocyanins in wild-type control Col (1.57 mg/ g dry weight) was set as value of 1.0. Data are presented as mean  $\pm$  SD, student's t-test (n=3 , \*P<0.05 , \*\*P<0.01).

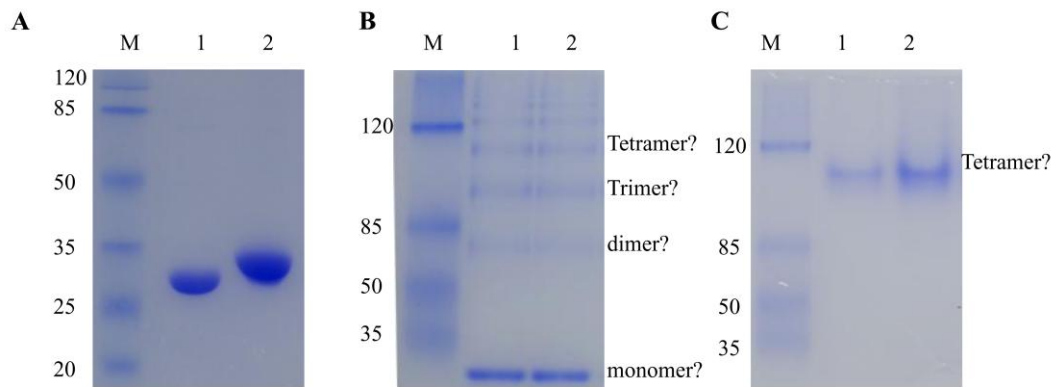

**Figure S5. Purified recombinant CHIL and TT5 proteins on denaturing and native PAGE.**

(A) Recombinant CHIL and TT5 proteins on denaturing SDS-PAGE. M, protein marker; 1, recombinant CHIL protein; 2, recombinant TT5 protein.

(B-C) Recombinant CHIL (B) and TT5 (C) proteins on native PAGE. M, protein marker; 1-2, recombinant protein.

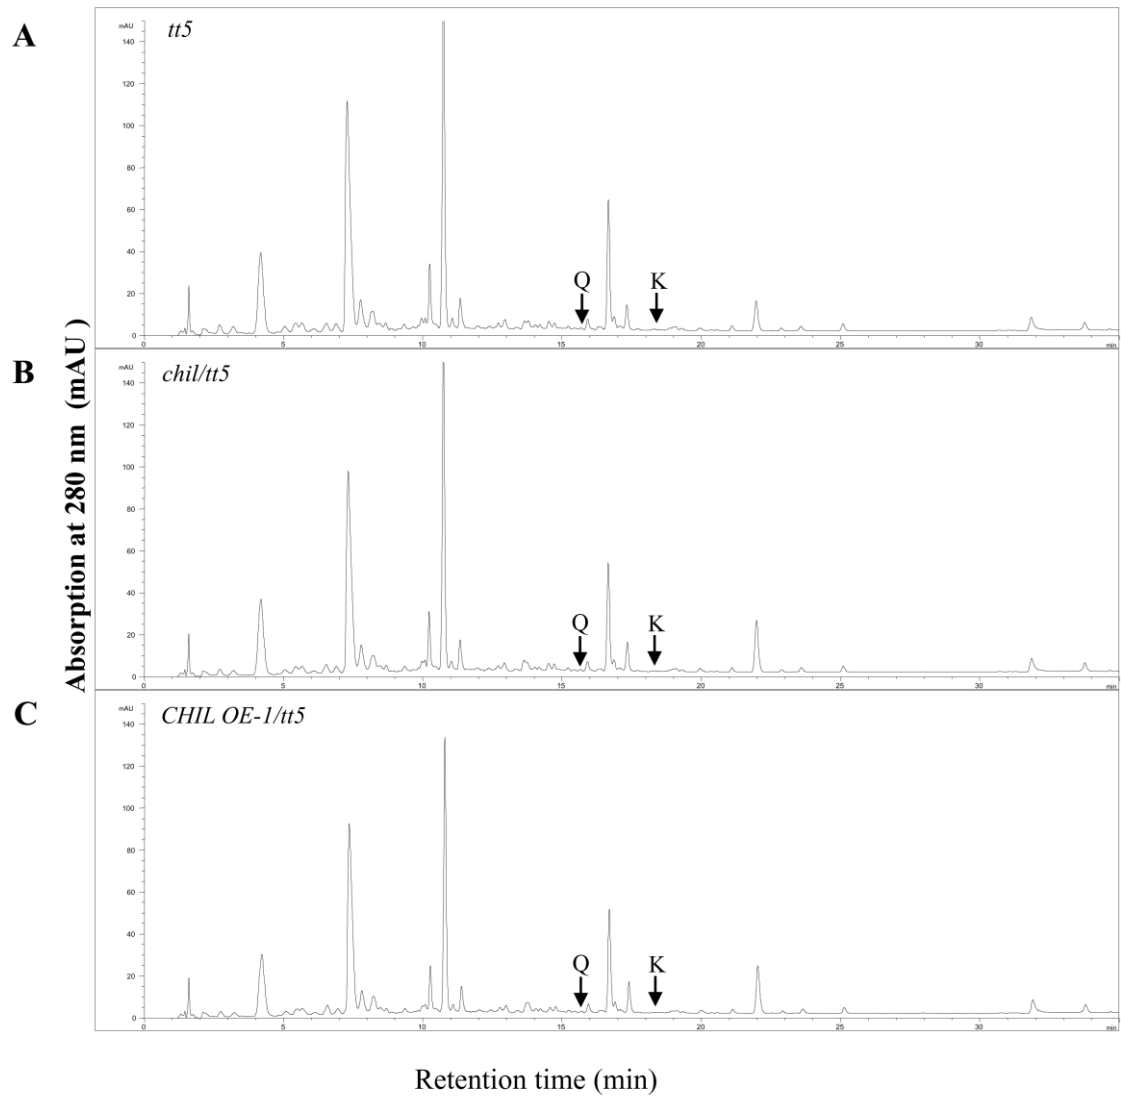

**Figure S6. Representative HPLC chromatograms of *CHIL* loss-of-function and over- expression lines in the *tt5* background.**

The chromatograms were obtained from methanolic extracts of mature seeds from lines of *tt5* (A), *chil-1/tt5* (B) and *CHIL OE-1/tt5* (C). All the lines showed the same flavonol profile on HPLC.

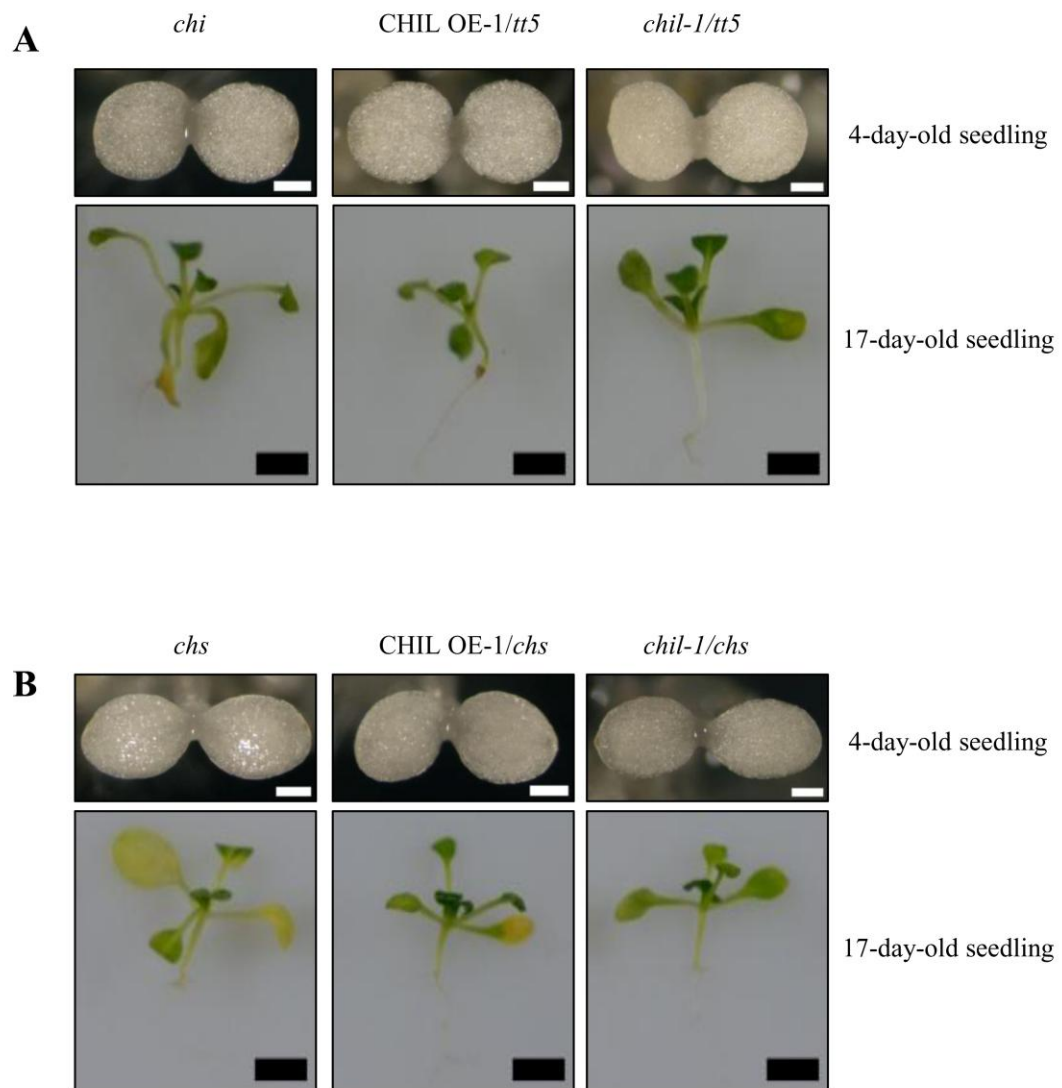

**Figure S7. Anthocyanin accumulation in the *CHIL* loss-of-function and over-expression lines in the *tt5* and *chs* mutant background.**

Anthocyanin accumulation in the 4-day-old seedlings of *Arabidopsis* (the upper panels, bars=0.5 mm) and 17-day-old seedlings (the bottom panels, bars=5 mm) of *tt5*, *chil-1/tt5* and CHIL OE-1/*tt5* (A); of *chs*, *chil-1/chs* and CHIL OE-1/*chs* (B).

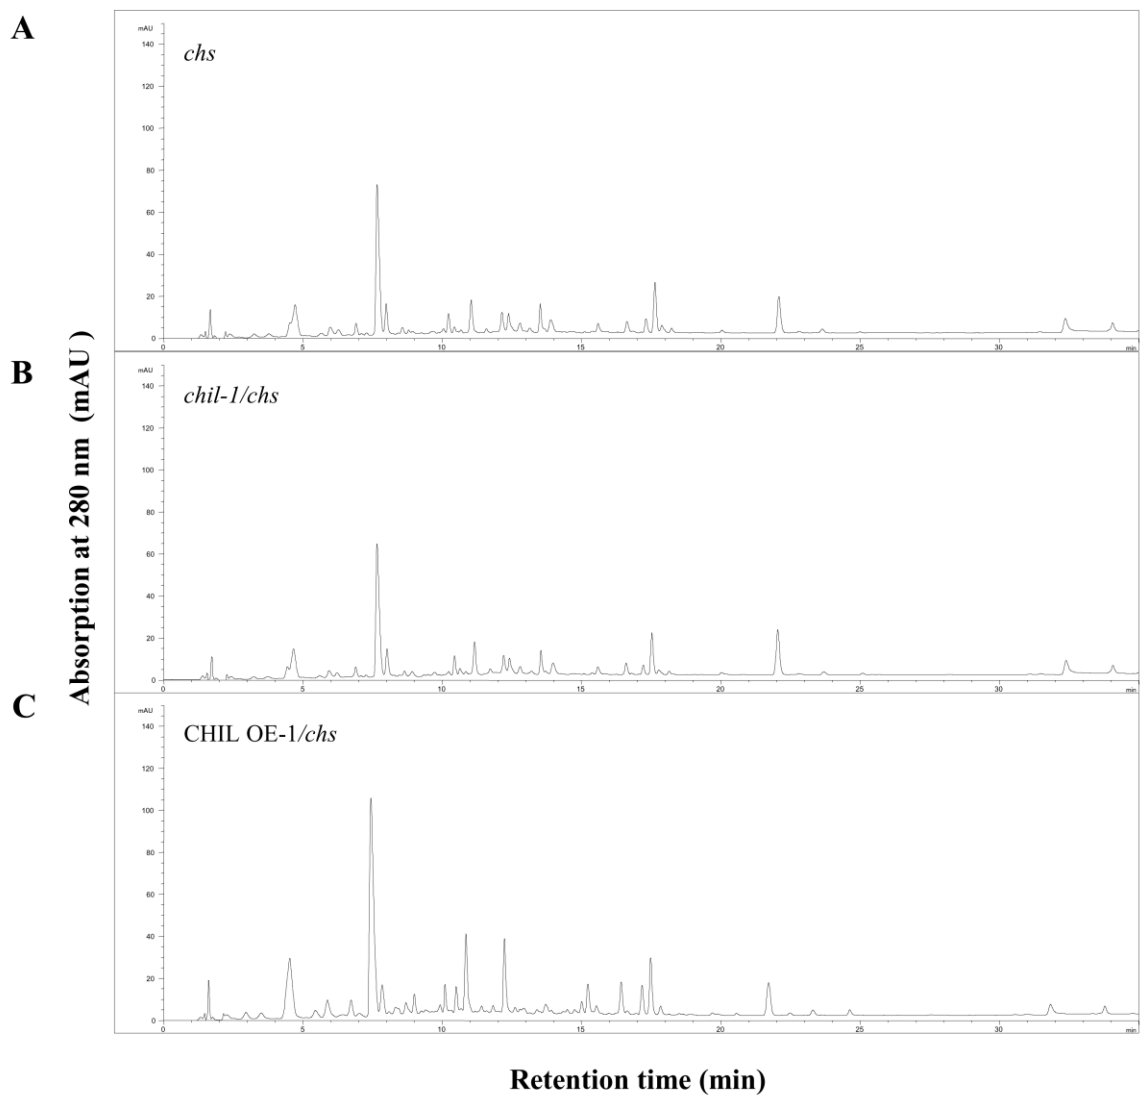

**Figure S8. Representative HPLC chromatograms of *CHIL* loss-of-function and over-expression lines in the *chs* background.**

The chromatograms were obtained from methanolic extracts of mature seeds from lines of *chs* (A), *chil-1/chs* (B) and CHIL OE-1/*chs* (C). All the lines showed the same flavonol profile on HPLC as *chs* mutant.



TGGGGTGGAGTCAAGCATTTTTTTTTAAATCTCAATTTGGAGAAATTATTTGAGTTCGAAAAGGTTTTTCTTATCT  
 ATGATGAGGAATAAGCTATTTATAGCCATGAAACAAATGCTTTTGTTAAGTGAATCTATGGAAAATAAATGTGCTTT  
 AAATGTTGAAGAAAACAATGTAAATGAATCCACGATTTTCAACAGCTCATATGTAAGACATGTTTTTTCTTTGATT  
 ATTCCTTATCCCTTATAAATCTGTGGATGTAAATTGGTAATGCATCATTATGAAATCCTGTCCCTTTTAGGTAGCGC  
 CATCATTAGAAAAACCACGATTTTCAACAGCTCATAIGCTAATGTATTACATGTTGTGTTTTAAGTACATTTCTATTT  
 AATTACCAACTTTTTACTTTTTCCAAATTCGTCTAAATCTAATCTCTAAGGATAAAATTTGCTTACGATTCCTTAATCCTTA  
 TCCCTTTAAAATCTTGTGTGATGTTAAATGTAAATGCTGTTTATGAAATCTTTATCCCTTTTAGGTAGCGCCACGTTAA  
 AAACAATATGGACATGGAGATTTGGGCTTATAAAAACTGTAAATATTTGGCCCACTTAAAAATTGATTCAGCTTCTGT  
 AAATTAATCCTAGCAGCTTCCATTGGCTCGACATGCGTAGCAAAAAGGAATACCCACGACTATCCATCAACCATGA  
 AATTAATTAGGAGCGAATTAACATAATCAAATTACATAAGGACTAATTAAGAAAAGCTAGAGATTGTGATTAGAG  
 AATAGAGATTATACCATGACTTGTGAAGCCAATTTTGGCACTTTCACACATTACCCAATCTCTTTCAGTTGTCTCT  
 TCGATCCTTTGTCCCACTTGGCTCTTAGTTTATGTGTCGAAAGATGGGCATAGCTTCAATAGTCAGTTTCGATTTGC  
 AGCAGTAACACTTACTTACCAGTTCAAAAATGTGATAATGATCGCAATAGATTGAGATATGACTTATGAGTGATCCCC  
 AAACTCACGGCTTCGATTAGTCCTCGCTTCGATGCCATAAGCTGAGCCTCTAAACCCGTAATAGCGGAGTCATGAATT  
 GATCCTTTCATGATTTGGGAGGTTCGAGATAGAAGAGAAGACGAAAAAGGGTTTTTATACGTTACTGCTTTAAAGACA  
 CTCTTTATTTCTTTTTTTTTTTTTTTTTTTTTTTTTGGGTCCTTGTCAATCAGTTTACTTTACGTTACTGATTCAAG  
AGCCGTTGTGGAGAAATGTGGCTGCTTCTAATTTGTATCTAATTTATGTACGCTTTGTTTCACATTGACATCTGATC  
 TCTTTTACTGTATCATAGCAATCTTCTTCTATCTCTTTTAATTATTATACTTCTATACCTTCATTGTTAGGTAGAATG  
 AGTGGTTGTGGACTGAGTGCTTGATCCAAACACGTGGCTTCTGTTGGTGGTTCGCTAACAAACAATTGAGATCACAAG  
 CTTTGGTAGCAAAAAAATTGAATTCATAAAAAGAATACGTCGCTTTTAGATCACAAGCTTTGAACGTTAGCAAAATT  
ATGTTACCTACCACAGTCCCTGGCTTATTATATAGAGAGATATTCACATTTACAATTTGATATTGTTTCTTAAGA  
TCGTAAAATAGTACACCAAGCCATTATAAATTTCTTCACTCTCAGATTCAAAATAATATAATTAGAAAGTAAGTCT  
ACACTC

**Figure S9. Cis-acting elements upstream the ORF of the *CHIL* gene as predicted by PLACE.**

The binding sites are highlighted in yellow (S000144: EBOXBNNAPA) and green (S000176: MYBCORE), respectively. The capital A in blue is the A for start codon ATG. The primer positions are boxed.

AGAA**CAATTG**CTTAAGTAAAGCAAGACCATTACCCTCCTCAAGGTTTCGCTATCTGCTCGTTCCTTTGCTTACTT  
 GGCCTCTGTTTTCTGTTTCGTTTTCCCTACTTATTGCCTATTGGTGATAGTTCTGTTTCGTAGTGTGCTCTCCTTTGT  
 TTGCTGTCTTGTCCCTTTGGGTGCAGTTCAAAAAATTAATACTAGGGGCTG**CTGTTG**AATGTTTTGCGAATTTTCA  
 ACCATATAGTTATATCAATATTCAGTATTGGTGATAGTTCTTTTCCACAATGGTCAGCAAAATAAAATATCAACAAAA  
 GTTCAACCACGAAGTTTAGTAGATATGAAATGAATATTGCCATCCACGTTGGAGATATAAGTTTTATGGTCCGGAC  
 TCCCTACTTCATACTTCATACTTCATATATAGTATATTTACTCAAAGAAAAAAATGGGA**CAAGTG**AAAAATCTAGTGA  
 ATTAATGTATTACCTAAATTTGAGATATAATATTTCTGGTGTGATAGACATTACTCACTATTCAATGACTCAAAATTT  
 AAAACATGCATGTCAGAACAATAATTCGAAC**CAATTG**AATACA**CATTG**AAATTAGTGTCTTATAATTGAATT  
 TTGATGCGCAAGTCATTTTGATGAGAAAATTAGAAGATCAAAAATGGACAAATCAAGATACATGGAGAATTAGGATA  
 TGAAAAATAGTTTTAAAATTATGTCTATATGTATGGAACATTAGAACATTTTGGTAGAGAGTAAATGATCAAAAAAT  
 CTGGTTATCTGAGGTGTA AAAAGATTGGCTACTGCAATAAACATGGCA**CAGATG**TTAGAAAATTTAAAGTTAAATGAT  
 TCAAAGTTTTATATAATTTGGGACAATCAAAATCTTGTGACTTATATAATGTGATATTAATGTATTCACTAAACTACAA  
 AGTAAATAATTAATTTACTTTTTAAATTTGGTAGAGGTTGATTTTGCAATAATGACTATTAATGAATAAAGTTCAACA  
 TATCACAGTAGACGTTAAATTTGAACTACTTATGTATATAAATCGACAATACATTTAAAGTATTTAAATGCG**CAGTTA**  
 ATTGAAGCCATAAAATTTGCAAACCGAAAATTTATGCTTTCAAAGTAAACATTTATGCTTTCACACTGATTAAG  
 GGCCCTTCTATAAACTTTTCCATTAATAATTTTTCATTTAAATATTAGATGATCTTAAATGGTTTACTCAAAGTAAATATA  
 TATATATGAAGAATTAAGAAAGTGTGGAGCATTTTAAAACCTTTTTTCTCTAGTTTTTTTTGCTTTTTTTTTGGGC  
 AACGTTTCGTTCCCTCGAGTCTATAAATTTTGGCATTTTGTTTTTGTTTTTTCAGTGACAAACT**CACATG**GATTT  
 CATTTCAGATT**CAGTTA**GATTTTATTATACTTCAGCCCAGTGTAGGAACAACCGGAACCCAAAATCTAGAGAGCATT  
 ATGGTGGGGTTCAATAGCCCATGTAATAGCCCACTTCCCGGCATCAGAAGTACAAATCCAAAATGAATTGAAATG  
 TGTTTATAACCCGATTAGTTTTAATATTACGGAACAAAACAAATCAAAACCATAACTCAAATAACGAAGTCATATAA  
 TAGATATGATAAATTTATATTAACGTTTTATTAATATAAAAGAGTGTAAAAGTTTTTATTTATCTAAAATGAACATA  
 GTTAAACGAAAACCAACCAATCTAAGTA**CAATTG**TTCAAAACCAAAAGTGAACCAAGTTGAATTATTGTTTTAAT  
 TCACAAAACGATTTGTTGAAATAAGGGCTGAAGTCGTAGAAGCTTTAATAGATAAGAAAAGAAAGAGATATGTTGAT  
 ATTGAGAATACCCAAAAACTAGGATTTCTGAATATTAGAACTAGAGAACGTAAGAAATCTTTGATTTTTCTTTG  
 ATTTTCCGAAAGTAAGAATTAGAGAATACTTTTTCTGAAAAGCTATTTTTTTTTTTTTAATTTTATTGATCAAT**CAACT**  
**G**AATACTGAATACAAAAGAAAACCTGATTTATTATAATAAACTCAATTTATTATAATATAATCAAAAACCTAGATA  
 AACTCTAAAATAATCATATAATTATCTCAAATAACCAAAATATATAAAATCAATAATATGAAAGATAACGATAGAAAATA  
 TTTGAAATTATCCTAACTATGTGCTCTGCATATTTAAGGGCTCAAAGCTTCAACCAC**CAATTG**TCAATGCATCTCCCAA  
 TCAAAATATAAAAAAGAGACGAAAACGAAAGTA**CACGTG**CTTACACATCCAACACTCGTAATCGTAACTATTGCTA  
 CCTACCCTTCTCTTCTACTTAACCCCAAAGGCCCAAAAACAC**AATCAAGAAAAGCTCTGTAACATTATTATCAAT**  
**CGAAATCCAACCGACTCAACA****ATG**

**Figure S10. *Cis*-acting elements upstream the ORF of the *CHI* gene as predicted by PLACE.**

The binding sites are highlighted in yellow (S000144: EBOXBNNAPA) and green (S000176: MYBCORE), respectively. The capital ATG in blue is start codon.

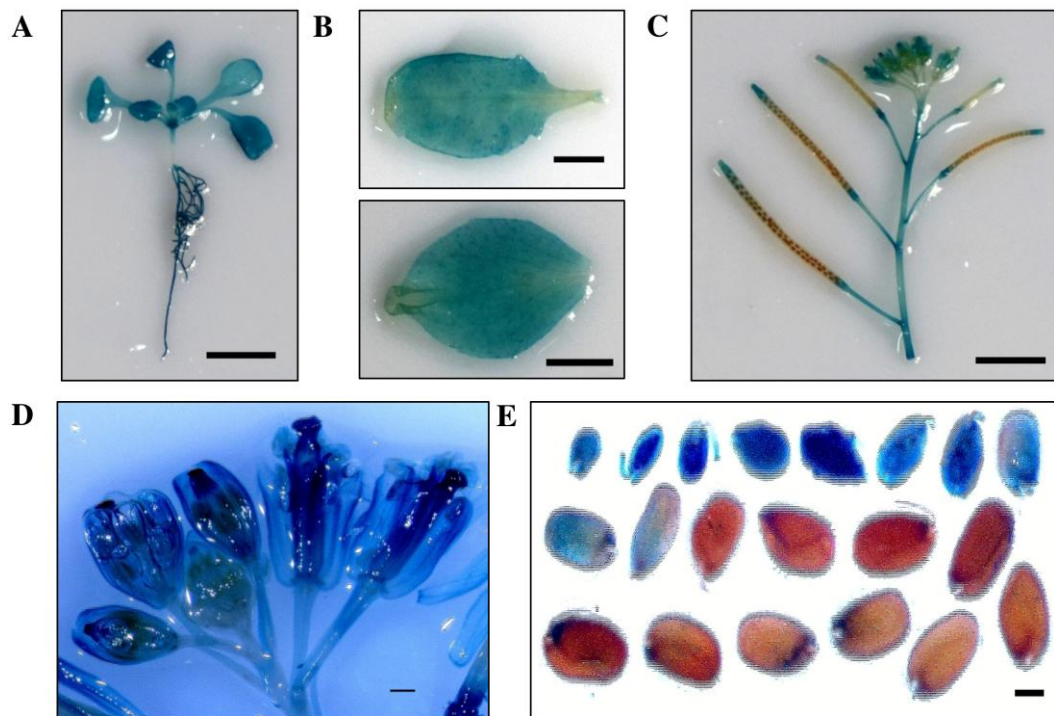

**Figure S11. Tissue-specific promoter activity of *CHIL* promoter fused with GUS.**

(A) GUS staining of 10-day-old seedlings of Arabidopsis.

(B) GUS staining of rosette leaves (the upper panels) and cauline leaves (the bottom panels).

(C, D) GUS staining of young siliques and inflorescences.

(E) GUS staining of young seeds (from 1- to 10-day-old seeds).

Bars=5 mm in A, B and C; Bars=0.5 mm in D; Bars=0.2 mm in E.

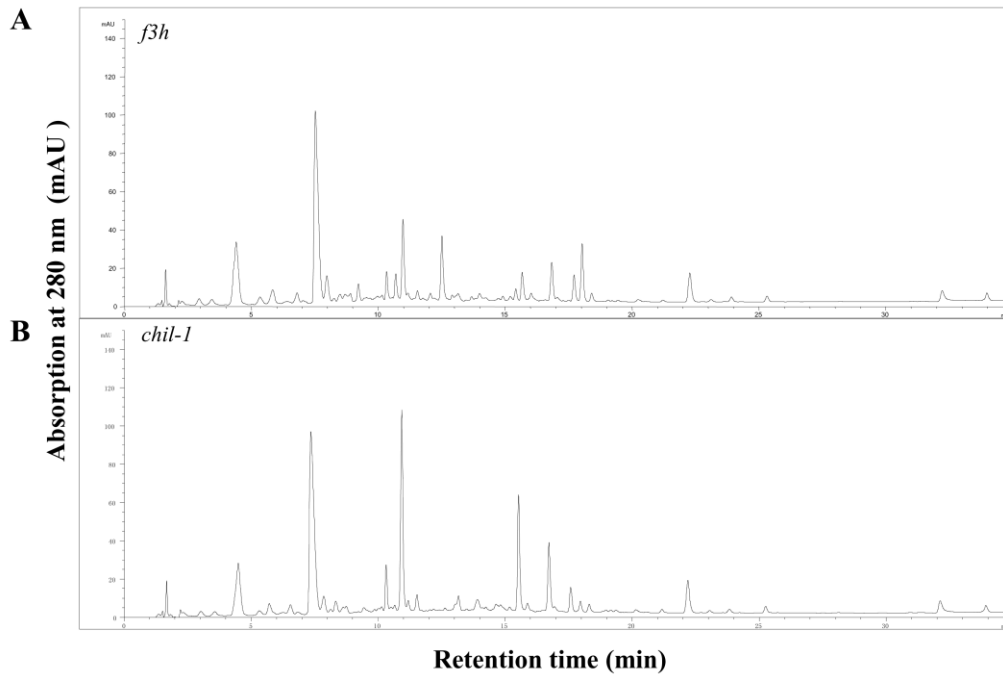

**Figure S12. Representative HPLC chromatograms of *F3H* loss-of-function in comparison to *chil-1* mutant in the Col background.**

The chromatograms were obtained from methanolic extracts of mature seeds from lines of *f3h* (A) and *chil-1* (B).

**Table S1. The probe sets with expression more than 2 fold down-regulated in seeds of the tt2 mutant of Arabidopsis.**

| Probe Set ID | Representative Public ID | Target Description                                                                                                | Fold change (tt2/Ler) | Fold change (Ler/tt2) | Pts         | Pta |
|--------------|--------------------------|-------------------------------------------------------------------------------------------------------------------|-----------------------|-----------------------|-------------|-----|
| 266169_at    | At2g38900                | putative protease inhibitor                                                                                       | 0.01                  | 97.41                 | 0.000109361 | 0   |
| 249215_at    | At5g42800                | dihydroflavonol 4-reductase                                                                                       | 0.02                  | 43.93                 | 5.70715E-05 | 0   |
| 249700_at    | At5g35530                | 40S ribosomal protein S3                                                                                          | 0.03                  | 39.53                 | 3.93708E-05 | 0   |
| 264401_at    | At1g61720                | anthocyanidin reductase                                                                                           | 0.03                  | 34.82                 | 0.000957021 | 0   |
| 262083_at    | At1g56100                | hypothetical protein predicted by genemark.hmm                                                                    | 0.04                  | 23.60                 | 6.43787E-05 | 0   |
| 254283_s_at  | At4g22870                | anthocyanidin synthase - like protein putative leucoanthocyanidin dioxygenase, Arabidopsis thaliana, PID:g1575699 | 0.05                  | 22.03                 | 0.00096712  | 0   |
| 249704_at    | At5g35550                | Myb-related transcription factor LBM2-like protein                                                                | 0.07                  | 14.07                 | 8.06641E-05 | 0   |
| 250083_at    | At5g17220                | glutathione S-transferase-like protein                                                                            | 0.07                  | 13.82                 | 9.5222E-06  | 0   |
| 262119_s_at  | At1g02930                | glutathione S-transferase                                                                                         | 0.07                  | 13.70                 | 1.01387E-05 | 0   |
| 263757_at    | At2g21430                | cysteine proteinase similar to cysteine proteinase RD19A (thiol protease)                                         | 0.09                  | 11.30                 | 2.33055E-05 | 0   |
| 245556_at    | At4g15400                | HSR201 like protein                                                                                               | 0.12                  | 8.08                  | 2.53147E-05 | 0   |
| 248937_at    | At5g45770                | putative protein contains similarity to unknown protein (pir T04868)                                              | 0.13                  | 7.79                  | 4.12587E-06 | 0   |
| 252306_at    | At3g49270                | hypothetical protein                                                                                              | 0.13                  | 7.79                  | 5.14966E-05 | 0   |
| 256290_at    | At3g12203                | serine carboxypeptidase                                                                                           | 0.13                  | 7.74                  | 0.000108163 | 0   |
| 253902_at    | At4g27170                | NWMU4 - 2S albumin 4 precursor                                                                                    | 0.13                  | 7.68                  | 4.32825E-05 | 0   |
| 264740_at    | At1g62070                | unknown protein                                                                                                   | 0.13                  | 7.44                  | 3.82742E-06 | 0   |
| 249703_at    | At5g35560                | putative protein strong similarity to unknown protein (gb AAD21756.1)                                             | 0.14                  | 7.35                  | 0.000129594 | 0   |
| 251202_at    | At3g63040                | putative protein predicted protein                                                                                | 0.14                  | 7.27                  | 6.48631E-06 | 0   |
| 264737_at    | At1g62210                | unknown protein                                                                                                   | 0.14                  | 7.19                  | 4.1869E-06  | 0   |
| 264079_at    | At2g28490                | putative seed storage protein (vicilin-like)                                                                      | 0.15                  | 6.87                  | 0.000356611 | 0   |
| 247424_at    | At5g62850                | LIM7 - like protein LIM7, Liliium longiflorum, EMBL:LLORF07                                                       | 0.15                  | 6.82                  | 0.000324415 | 0   |
| 262431_at    | At1g47540                | trypsin inhibitor 2                                                                                               | 0.15                  | 6.75                  | 0.003883758 | 0   |

|             |           |                                                                                                                                              |      |      |             |   |
|-------------|-----------|----------------------------------------------------------------------------------------------------------------------------------------------|------|------|-------------|---|
| 250501_at   | At5g09640 | carboxypeptidase - like protein GC donor splice site at exon 11 and 13                                                                       | 0.15 | 6.68 | 0.000854174 | 0 |
| 264741_at   | At1g62290 | aspartic protease                                                                                                                            | 0.15 | 6.65 | 3.82257E-06 | 0 |
| 249474_s_at | At5g39190 | germin-like protein (GLP2a) copy2                                                                                                            | 0.15 | 6.63 | 0.000323341 | 0 |
| 262528_at   | At1g17260 | H <sup>+</sup> -transporting ATPase AHA10                                                                                                    | 0.15 | 6.56 | 1.08261E-05 | 0 |
| 251838_at   | At3g54940 | cysteine proteinase non-consensus AG donor site at exon 2                                                                                    | 0.15 | 6.55 | 6.62534E-05 | 0 |
| 248647_at   | At5g49190 | sucrose synthase                                                                                                                             | 0.16 | 6.43 | 2.99763E-06 | 0 |
| 264187_at   | At1g54860 | unknown protein                                                                                                                              | 0.16 | 6.28 | 2.49324E-05 | 0 |
| 253930_at   | At4g26740 | embryo-specific protein 1 (ATS1)                                                                                                             | 0.16 | 6.19 | 1.08787E-05 | 0 |
| 259167_at   | At3g01570 | putative oleosin similar to oleosin GB:AAB58402 [Sesamum indicum]                                                                            | 0.17 | 6.05 | 4.72677E-06 | 0 |
| 250620_at   | At5g07190 | embryo-specific protein 3 (ATS3)                                                                                                             | 0.17 | 6.03 | 0.000131087 | 0 |
| 256073_at   | At1g18100 | terminal Flower 1 (TFL1), putative similar to terminal Flower 1 (TFL1)                                                                       | 0.17 | 5.95 | 2.10197E-05 | 0 |
| 249353_at   | At5g40420 | oleosin ; supported by cDNA: gi_725259_gb_L40954.1_ATHOLEOSIN                                                                                | 0.17 | 5.90 | 0.000107705 | 0 |
| 260088_at   | At1g73190 | tonoplast intrinsic protein, alpha (alpha-TIP)                                                                                               | 0.17 | 5.78 | 2.35306E-05 | 0 |
| 264482_at   | At1g77210 | sugar carrier protein, putative similar to sugar carrier protein GI:169735 from [Ricinus communis]                                           | 0.17 | 5.77 | 0.000271697 | 0 |
| 260716_at   | At1g48130 | peroxiredoxin identical to SP:O04005 from [Arabidopsis thaliana]                                                                             | 0.18 | 5.70 | 0.000281267 | 0 |
| 248297_at   | At5g53100 | protochlorophyllide reductase; oxidoreductase required for shoot apex development                                                            | 0.18 | 5.69 | 3.84634E-05 | 0 |
| 265672_at   | At2g31980 | putative cysteine proteinase inhibitor B (cystatin B)                                                                                        | 0.18 | 5.67 | 0.000846778 | 0 |
| 249112_at   | At5g43780 | ATP sulfurylase precursor (gb AAD26634.1)                                                                                                    | 0.18 | 5.65 | 6.44591E-06 | 0 |
| 258240_at   | At3g27660 | oleosin isoform identical to oleosin isoform GB:S71286 from [Arabidopsis thaliana]                                                           | 0.18 | 5.64 | 3.21882E-05 | 0 |
| 258327_at   | At3g22640 | unknown protein contains similarity to major storage protein GB:384341 from [Theobroma cacao]; supported by cDNA: gi_16604373_gb_AY058085.1_ | 0.18 | 5.61 | 7.58589E-05 | 0 |
| 254095_at   | At4g25140 | oleosin, 18.5K                                                                                                                               | 0.18 | 5.59 | 7.16342E-06 | 0 |
| 250475_at   | At5g10180 | sulfate transporter                                                                                                                          | 0.18 | 5.55 | 3.29419E-05 | 0 |
| 250157_at   | At5g15180 | prx10 peroxidase - like protein prx10 peroxidase, Spinacia oleracea, EMBL:SOY16776                                                           | 0.19 | 5.34 | 0.000182366 | 0 |
| 259813_at   | At1g49860 | glutathione S-transferase                                                                                                                    | 0.19 | 5.24 | 0.000219886 | 0 |
| 255741_at   | At1g25410 | tRNA isopentenyl transferase                                                                                                                 | 0.19 | 5.19 | 0.000391423 | 0 |

|           |           |                                                                                                                                                               |      |      |             |             |
|-----------|-----------|---------------------------------------------------------------------------------------------------------------------------------------------------------------|------|------|-------------|-------------|
| 260546_at | At2g43520 | putative trypsin inhibitor                                                                                                                                    | 0.20 | 5.06 | 9.98677E-05 | 0           |
| 263138_at | At1g65090 | hypothetical protein predicted by genemark.hmm                                                                                                                | 0.20 | 4.97 | 5.27717E-05 | 0           |
| 252119_at | At3g51030 | thioredoxin h                                                                                                                                                 | 0.20 | 4.95 | 0.001359942 | 0           |
| 258578_at | At3g04200 | germin-like protein contains Pfam profile: PF01072 germin family                                                                                              | 0.20 | 4.88 | 2.23269E-05 | 0           |
| 248125_at | At5g54740 | 2S storage protein-like                                                                                                                                       | 0.21 | 4.79 | 2.85813E-06 | 0           |
| 253894_at | At4g27150 | NWMU2 - 2S albumin 2 precursor                                                                                                                                | 0.21 | 4.73 | 6.56441E-07 | 0           |
| 248520_at | At5g50600 | 11-beta-hydroxysteroid dehydrogenase-like                                                                                                                     | 0.21 | 4.72 | 0.000100714 | 0           |
| 265117_at | At1g62500 | putative proline-rich cell wall protein (pir)IS52985                                                                                                          | 0.21 | 4.72 | 0.00014669  | 0           |
| 253895_at | At4g27160 | NWMU3 - 2S albumin 3 precursor                                                                                                                                | 0.22 | 4.47 | 0.00031598  | 0           |
| 259975_at | At1g76470 | putative cinnamoyl-CoA reductase similar to cinnamoyl-CoA reductase GB:CAA56103 [Eucalyptus gunnii]; contains non-consensus GG acceptor splice site at exon 4 | 0.22 | 4.46 | 4.15383E-05 | 0           |
| 254036_at | At4g25980 | putative peroxidase peroxidase (EC 1.11.1.7) precursor, cationic (clonePNC2) - peanut, PIR2:B38265                                                            | 0.22 | 4.46 | 1.32714E-05 | 0           |
| 265891_at | At2g15010 | putative thionin                                                                                                                                              | 0.23 | 4.42 | 5.11946E-05 | 0           |
| 261181_at | At1g34580 | monosaccharide transporter, putative similar to GB:X66856 from [Nicotiana tabacum]                                                                            | 0.23 | 4.38 | 0.001620288 | 2.9392E-186 |
| 265095_at | At1g03880 | putative cruciferin 12S seed storage protein identical to 12S seed storage protein, gi 808937                                                                 | 0.23 | 4.35 | 0.002152607 | 0           |
| 251188_at | At3g62730 | putative protein DESSICATION-RELATED PROTEIN PCC13-62 PRECURSOR - Craterostigma plantagineum, PIR:E45509                                                      | 0.23 | 4.34 | 0.000857121 | 0           |
| 260797_at | At1g78390 | neoxanthin cleavage enzyme, putative similar to neoxanthin cleavage enzyme GI:9857290 from [Vigna unguiculata]                                                | 0.23 | 4.30 | 6.21208E-05 | 0           |
| 267431_at | At2g34870 | unknown protein ;supported by full-length cDNA: Ceres:29605.                                                                                                  | 0.23 | 4.26 | 1.20527E-05 | 0           |
| 251504_at | At3g59030 | putative protein putative multidrug efflux protein NorM - Vibrio parahaemolyticus, EMBL:AB010463;                                                             | 0.23 | 4.26 | 0.000177337 | 0           |
| 266143_at | At2g38905 | Expressed protein ; supported by cDNA: gi_15529213_gb_AY052231.1_                                                                                             | 0.24 | 4.24 | 0.002009474 | 8.3025E-300 |
| 265644_at | At2g27380 | hypothetical protein predicted by genefinder and genscan                                                                                                      | 0.24 | 4.19 | 0.000278521 | 0           |
| 248435_at | At5g51210 | oleosin-like                                                                                                                                                  | 0.24 | 4.15 | 7.76979E-06 | 0           |
| 264612_at | At1g04560 | unknown protein similar to GB:AAC37469; supported by cDNA: gi_15293292_gb_AY051080.1_                                                                         | 0.24 | 4.12 | 0.000180422 | 0           |
| 253004_at | At4g38330 | putative protein                                                                                                                                              | 0.24 | 4.11 | 0.013683281 | 0           |

|             |           |                                                                                                                                                         |      |      |             |             |
|-------------|-----------|---------------------------------------------------------------------------------------------------------------------------------------------------------|------|------|-------------|-------------|
| 248028_at   | At5g55620 | putative protein similar to unknown protein (gb AAF04428.1);supported by full-length cDNA: Ceres:27668.                                                 | 0.24 | 4.11 | 0.000202724 | 0           |
| 245072_s_at | At2g23220 | putative cytochrome P450                                                                                                                                | 0.24 | 4.08 | 6.50859E-05 | 0           |
| 254906_at   | At4g11180 | putative disease resistance response protein disease resistance response protein 206-d - Pisum sativum, PID:g508844                                     | 0.25 | 3.97 | 9.47712E-05 | 0           |
| 267317_at   | At2g34700 | putative proline-rich glycoprotein                                                                                                                      | 0.25 | 3.96 | 0.000207292 | 0           |
| 264606_at   | At1g04660 | unknown protein ;supported by full-length cDNA: Ceres:98340.                                                                                            | 0.26 | 3.92 | 0.001672704 | 1.4868E-229 |
| 252234_at   | At3g49780 | putative protein ; supported by full-length cDNA: Ceres: 40302.                                                                                         | 0.26 | 3.88 | 2.35562E-07 | 0           |
| 266415_at   | At2g38530 | putative nonspecific lipid-transfer protein ;supported by full-length cDNA: Ceres:18328.                                                                | 0.26 | 3.86 | 5.01269E-05 | 0           |
| 267137_at   | At2g23410 | hypothetical protein predicted by genscan; supported by cDNA: gi_6651293_gb_AF162441.1_AF162441                                                         | 0.26 | 3.83 | 0.000454657 | 0           |
| 249082_at   | At5g44120 | legumin-like protein                                                                                                                                    | 0.26 | 3.79 | 2.31779E-05 | 0           |
| 250583_at   | At5g07500 | zinc finger transcription factor ; supported by cDNA: gi_2961541_gb_AF050463.1_AF050463                                                                 | 0.27 | 3.76 | 0.000935827 | 0           |
| 249495_at   | At5g39100 | germin - like protein GLP6 exon 2 interrupted by a stop codon, creating non-consensus donor and acceptor splice sites                                   | 0.27 | 3.72 | 4.88243E-05 | 0           |
| 265725_at   | At2g32030 | putative alanine acetyl transferase                                                                                                                     | 0.27 | 3.70 | 9.36245E-05 | 0           |
| 260928_at   | At1g02720 | hypothetical protein similar to putative glycosyl transferase GB:CAB80706 GI:7268597 from [Arabidopsis thaliana]                                        | 0.27 | 3.68 | 4.71511E-05 | 0           |
| 248754_at   | At5g47670 | putative protein contains similarity to CCAAT-box-binding transcription factor                                                                          | 0.27 | 3.68 | 0.000926847 | 0           |
| 267075_at   | At2g41070 | putative bZIP transcription factor contains a bZIP transcription factor basic domain signature (PDOC00036);supported by full-length cDNA: Ceres:114632. | 0.27 | 3.68 | 0.000187276 | 0           |
| 266465_at   | At2g47750 | putative auxin-responsive protein ; supported by cDNA: gi_15810039_gb_AY054288.1_                                                                       | 0.28 | 3.61 | 4.07135E-06 | 0           |
| 253767_at   | At4g28520 | 12S cruciferin seed storage protein                                                                                                                     | 0.28 | 3.60 | 0.000558273 | 0           |
| 253241_at   | At4g34520 | fatty acid elongase 1                                                                                                                                   | 0.28 | 3.57 | 4.35255E-05 | 0           |
| 256464_at   | At1g32560 | late-embryogenesis abundant protein, putative similar to GI:4102692 from [Glycine max]                                                                  | 0.28 | 3.55 | 0.002066597 | 0           |
| 245335_at   | At4g16160 | pore protein homolog ;supported by full-length cDNA: Ceres:5714.                                                                                        | 0.28 | 3.53 | 2.88563E-05 | 0           |
| 259742_at   | At1g71120 | putative proline-rich APG protein similar to ANTER-SPECIFIC PROLINE-RICH PROTEIN APG                                                                    | 0.29 | 3.42 | 7.18046E-05 | 0           |



| PRECURSOR GB:P40602 |           |                                                                                                                                                            |      |      |             |             |
|---------------------|-----------|------------------------------------------------------------------------------------------------------------------------------------------------------------|------|------|-------------|-------------|
| 266613_at           | At2g14900 | similar to gibberellin-regulated proteins                                                                                                                  | 0.29 | 3.41 | 3.32565E-05 | 0           |
| 255905_at           | At1g17810 | tonoplast intrinsic protein, putative similar to tonoplast intrinsic protein GI:21054 from [ <i>Phaseolus vulgaris</i> ];                                  | 0.29 | 3.41 | 0.000121925 | 0           |
| 246498_at           | At5g16230 | stearoyl-acyl carrier protein desaturase stearoyl-acyl carrier protein desaturase sad1 - <i>Linum usitatissimum</i> , EMBL:AJ006957                        | 0.29 | 3.40 | 0.000113164 | 0           |
| 267041_at           | At2g34315 | unknown protein                                                                                                                                            | 0.30 | 3.39 | 1.25545E-05 | 0           |
| 253904_at           | At4g27140 | NWMU1 - 2S albumin 1 precursor ; supported by cDNA: gi_13899092_gb_AF370541.1_AF370541                                                                     | 0.30 | 3.37 | 0.000183637 | 0           |
| 262644_at           | At1g62710 | beta-VPE nearly identical to beta-VPE GB:BAA09615 GI:1805364 [ <i>Arabidopsis thaliana</i> ];                                                              | 0.30 | 3.34 | 0.000518624 | 0           |
| 255302_at           | At4g04830 | putative protein similar to transcriptional regulator;supported by full-length cDNA: Ceres:9218.                                                           | 0.30 | 3.32 | 0.000766429 | 0           |
| 259142_at           | At3g10200 | unknown protein similar to ankyrin like protein GB:CAB10215 [ <i>Arabidopsis thaliana</i> ]                                                                | 0.30 | 3.31 | 0.00029293  | 0           |
| 250519_at           | At5g08460 | GDSL-motif lipase/acylhydrolase-like protein                                                                                                               | 0.30 | 3.29 | 3.67879E-05 | 0           |
| 265094_at           | At1g03890 | putative cruciferin 12S seed storage protein highly similar to <i>Brassica napus</i> cruciferin storage protein,                                           | 0.31 | 3.28 | 5.75905E-05 | 0           |
| 260917_at           | At1g02700 | unknown protein similar to hypothetical protein GB:CAB80707 GI:7268598 from [ <i>Arabidopsis thaliana</i> ]; supported by cDNA: gi_15810578_gb_AY056328.1_ | 0.31 | 3.26 | 2.80395E-05 | 0           |
| 251137_at           | At5g01300 | putative protein several hypothetical proteins - different bacteria                                                                                        | 0.31 | 3.25 | 6.70745E-07 | 0           |
| 249913_at           | At5g22810 | GDSL-motif lipase/hydrolase-like protein                                                                                                                   | 0.31 | 3.24 | 1.60221E-06 | 0           |
| 262750_at           | At1g28710 | unknown protein ; supported by cDNA: gi_15027990_gb_AY045852.1_                                                                                            | 0.31 | 3.24 | 2.03384E-05 | 0           |
| 254494_at           | At4g20050 | putative protein C65DMY30S                                                                                                                                 | 0.31 | 3.20 | 0.000225051 | 0           |
| 249867_at           | At5g23020 | 2-isopropylmalate synthase-like protein                                                                                                                    | 0.32 | 3.17 | 1.36769E-05 | 0           |
| 248696_at           | At5g48360 | putative protein similar to unknown protein (gb AAF02158.1)                                                                                                | 0.32 | 3.17 | 0.00070063  | 0           |
| 248110_at           | At5g55320 | wax synthase-like protein                                                                                                                                  | 0.32 | 3.16 | 0.0005109   | 0           |
| 259782_at           | At1g29680 | unknown protein                                                                                                                                            | 0.32 | 3.16 | 0.0127021   | 1.25537E-80 |
| 252123_at           | At3g51240 | flavanone 3-hydroxylase (FH3) ;supported by full-length cDNA: Ceres:36653.                                                                                 | 0.32 | 3.15 | 8.74313E-05 | 0           |
| 261305_at           | At1g48470 | glutamine synthetase, putative similar to PIR:S18603 from [ <i>Arabidopsis thaliana</i> ];supported by full-length cDNA: Ceres:156550.                     | 0.32 | 3.14 | 0.006881798 | 0           |

|             |           |                                                                                                                                                                                                                                                                  |      |      |             |             |
|-------------|-----------|------------------------------------------------------------------------------------------------------------------------------------------------------------------------------------------------------------------------------------------------------------------|------|------|-------------|-------------|
| 258258_at   | At3g26790 | transcriptional regulator (FUSCA3) identical to FUSCA3 GB:AAC35247 [Arabidopsis thaliana] (Plant J. 6, 379-387 (1994));                                                                                                                                          | 0.32 | 3.12 | 0.000151861 | 0           |
| 252605_s_at | At3g45070 | sulfotransferase-like protein FLAVONOL 4 -SULFOTRANSFERASE - Flaveria chloraefolia, EMBL:M84136                                                                                                                                                                  | 0.32 | 3.11 | 0.009160931 | 1.1495E-107 |
| 264469_at   | At1g67100 | hypothetical protein similar to hypothetical protein GI:6553940 from [Arabidopsis thaliana]                                                                                                                                                                      | 0.32 | 3.10 | 0.000400703 | 0           |
| 246273_at   | At4g36700 | globulin-like protein                                                                                                                                                                                                                                            | 0.32 | 3.10 | 0.00628815  | 3.0815E-137 |
| 247762_at   | At5g59170 | cell wall protein                                                                                                                                                                                                                                                | 0.32 | 3.08 | 0.000186663 | 0           |
| 266849_at   | At2g25940 | putative vacuolar processing enzyme identical to GB:D61393; supported by cDNA: gi_16604313_gb_AY058055.1_                                                                                                                                                        | 0.32 | 3.08 | 0.000165402 | 0           |
| 264580_at   | At1g05340 | unknown protein EST gb ATTS0295 comes from this gene;supported by full-length cDNA: Ceres:20380.                                                                                                                                                                 | 0.33 | 3.08 | 0.000386779 | 0           |
| 261260_at   | At1g26680 | hypothetical protein predicted by genemark.hmm                                                                                                                                                                                                                   | 0.33 | 3.03 | 0.001087115 | 0           |
| 252269_at   | At3g49580 | putative protein ;supported by full-length cDNA: Ceres:26235.                                                                                                                                                                                                    | 0.33 | 3.02 | 0.006582597 | 2.71005E-80 |
| 252050_at   | At3g52550 | hypothetical protein                                                                                                                                                                                                                                             | 0.33 | 3.01 | 9.81134E-05 | 0           |
| 250438_at   | At5g10580 | putative protein predicted protein, Arabidopsis thaliana; supported by cDNA: gi_14326488_gb_AF385697.1_AF385697                                                                                                                                                  | 0.33 | 3.00 | 0.000890575 | 0           |
| 248918_at   | At5g45890 | senescence-specific cysteine protease SAG12 identical to senescence-specific protein SAG12 GI:1046373 from [Arabidopsis thaliana]                                                                                                                                | 0.33 | 3.00 | 0.000251484 | 0           |
| 251646_at   | At3g57780 | putative protein                                                                                                                                                                                                                                                 | 0.34 | 2.98 | 0.000805454 | 0           |
| 250258_at   | At5g13790 | floral homeotic protein AGL15 (sp Q38847)                                                                                                                                                                                                                        | 0.34 | 2.98 | 0.005338602 | 1.3929E-176 |
| 264721_at   | At1g23000 | hypothetical protein predicted by gensean+                                                                                                                                                                                                                       | 0.34 | 2.97 | 0.000114503 | 0           |
| 256898_at   | At3g24650 | abscisic acid-insensitive protein 3 identical to abscisic acid-insensitive protein 3 GB:Q01593 from [Arabidopsis thaliana], (Plant Cell 4 (10), 1251-1261 (1992))                                                                                                | 0.34 | 2.96 | 0.00144894  | 0           |
| 261455_at   | At1g21070 | unknown protein ;supported by full-length cDNA: Ceres:108746.                                                                                                                                                                                                    | 0.34 | 2.95 | 0.000107875 | 0           |
| 264346_at   | At1g12010 | putative amino-cyclopropane-carboxylic acid oxidase (ACC oxidase) Strong similarity to amino-cyclopropane-carboxylic acid oxidase gb L27664 from Brassica napus. ESTs gb Z48548 and gb Z48549 come from this gene; supported by cDNA: gi_15450652_gb_AY052694.1_ | 0.34 | 2.94 | 4.2419E-06  | 0           |

|             |           |                                                                                                                                                                                                                 |      |      |             |             |
|-------------|-----------|-----------------------------------------------------------------------------------------------------------------------------------------------------------------------------------------------------------------|------|------|-------------|-------------|
| 261503_at   | At1g71691 | hypothetical protein predicted by genemark.hmm, contains Pfam profile: PF00657<br>Lipase/Acylhydrolase with GDSL-like motif                                                                                     | 0.34 | 2.92 | 3.73652E-06 | 0           |
| 256827_at   | At3g18570 | hypothetical protein contains similarity to Pfam profile: PF01277 Oleosin                                                                                                                                       | 0.34 | 2.90 | 0.000184674 | 0           |
| 245410_at   | At4g17220 | putative protein                                                                                                                                                                                                | 0.35 | 2.88 | 0.000308676 | 0           |
| 266578_at   | At2g23910 | putative cinnamoyl CoA reductase ;supported by full-length cDNA: Ceres:14133.                                                                                                                                   | 0.35 | 2.82 | 5.13754E-05 | 0           |
| 263753_at   | At2g21490 | putative dehydrin ;supported by full-length cDNA: Ceres:5256.                                                                                                                                                   | 0.35 | 2.82 | 0.002057671 | 0           |
| 256918_s_at | At3g18960 | hypothetical protein similar to hypothetical protein GB:AAC72857 from [Arabidopsis thaliana]                                                                                                                    | 0.36 | 2.79 | 0.000417961 | 0           |
| 249702_at   | At5g35570 | axi 1 (auxin-independent growth promoter)-like protein ; supported by cDNA:<br>gi_14517443_gb_AY039557.1_                                                                                                       | 0.36 | 2.78 | 5.41558E-05 | 0           |
| 248625_at   | At5g48880 | 3-keto-acyl-CoA thiolase 2 (gb AAC17877.1) ; supported by cDNA:<br>gi_3192892_gb_AF062590.1_AF062590                                                                                                            | 0.36 | 2.75 | 7.23243E-05 | 0           |
| 265108_s_at | At1g62620 | similar to flavin-binding monooxygenase (Z71258); similar to ESTs gb R30018, gb T23015, and<br>gb T88100 contains similarity to flavin-containing monooxygenase 2 GB:AAD56413 GI:5923916 from<br>[Mus musculus] | 0.37 | 2.73 | 0.013530013 | 1.3552E-132 |
| 255471_at   | At4g03050 | putative oxidoreductase similar to A. thaliana putative protein F21P8.230, GenBank accession number<br>3445238                                                                                                  | 0.37 | 2.71 | 1.95273E-05 | 0           |
| 257242_at   | At3g24220 | 9-cis-epoxycarotenoid dioxygenase, putative similar to GB:CAB10168 from [Lycopersicon esculentum]<br>(J. Exp. Bot. 47, 2111-2112 (1997))                                                                        | 0.37 | 2.71 | 0.000128097 | 0           |
| 247897_at   | At5g57810 | unknown protein ;supported by full-length cDNA: Ceres:24169.                                                                                                                                                    | 0.37 | 2.69 | 9.73068E-05 | 0           |
| 253827_at   | At4g28085 | Expressed protein ; supported by cDNA: gi_15028040_gb_AY045877.1_                                                                                                                                               | 0.37 | 2.68 | 0.000253829 | 0           |
| 262047_at   | At1g80160 | hypothetical protein predicted by genemark.hmm;supported by full-length cDNA: Ceres:21663.                                                                                                                      | 0.38 | 2.67 | 0.000418805 | 0           |
| 258204_at   | At3g13960 | hypothetical protein predicted by genemark.hmm                                                                                                                                                                  | 0.38 | 2.64 | 0.014467774 | 1.23204E-80 |
| 245688_at   | At1g28290 | prolin-rich protein, putative similar to prolin-rich protein GI:21045 from [Phaseolus vulgaris]                                                                                                                 | 0.38 | 2.61 | 0.003251255 | 3.5237E-49  |
| 260961_at   | At1g05960 | unknown protein similar to hypothetical protein GB:AAF80120 GI:8810459 from [Arabidopsis thaliana ];<br>supported by cDNA: gi_14194168_gb_AF367291.1_AF367291                                                   | 0.39 | 2.56 | 0.000613929 | 0           |
| 266344_at   | At2g01580 | hypothetical protein predicted by genscan and genefinder                                                                                                                                                        | 0.39 | 2.55 | 0.001791233 | 0           |

|             |           |                                                                                                                                       |      |      |             |             |
|-------------|-----------|---------------------------------------------------------------------------------------------------------------------------------------|------|------|-------------|-------------|
| 251540_at   | At3g58740 | citrate synthase -like protein citrate synthase, cucurbit, PIR:S53007                                                                 | 0.39 | 2.55 | 0.000514098 | 0           |
| 253375_at   | At4g33280 | hypothetical protein                                                                                                                  | 0.39 | 2.54 | 0.002683679 | 3.2281E-228 |
| 262740_at   | At1g28590 | lipase, putative contains Pfam profile: PF00657 Lipase/Acylhydrolase with GDSL-like motif                                             | 0.40 | 2.53 | 9.91004E-05 | 0           |
| 247421_at   | At5g62800 | SIAH1 - like protein SIAH1, Brassica napus, EMBL:BNA245479                                                                            | 0.40 | 2.52 | 8.82853E-05 | 0           |
| 247904_at   | At5g57390 | putative protein contains similarity to unknown protein (gb AAD30633.1)                                                               | 0.40 | 2.51 | 0.004420171 | 1.6068E-129 |
| 261845_at   | At1g15960 | metal ion transporter, putative similar to metal ion transporter GI:5853313 from [Arabidopsis thaliana]                               | 0.40 | 2.50 | 0.00025307  | 0           |
| 256359_at   | At1g66460 | protein kinase, putative contains Pfam profile: PF00069: Eukaryotic protein kinase domain                                             | 0.40 | 2.49 | 0.000399601 | 0           |
| 246516_at   | At5g15740 | putative protein auxin-independent growth promoter - Nicotiana tabacum, PIR:A44226                                                    | 0.40 | 2.49 | 4.79937E-05 | 0           |
| 247182_at   | At5g65410 | putative protein contains similarity to unknown protein (pir T05568)                                                                  | 0.40 | 2.48 | 0.000151913 | 0           |
| 248365_at   | At5g52500 | putative protein strong similarity to unknown protein (emb CAB68146.1)                                                                | 0.41 | 2.47 | 6.51104E-05 | 0           |
| 253575_at   | At4g31060 | putative protein TINY, Arabidopsis thaliana, PID:E218696                                                                              | 0.41 | 2.47 | 0.000222478 | 0           |
| 245576_at   | At4g14770 | hypothetical protein                                                                                                                  | 0.41 | 2.46 | 0.000402784 | 0           |
| 267488_at   | At2g19110 | putative cadmium-transporting ATPase T20K24.13 has been merged with T20K24.12 per suggestion of Dr. Kristian Axelsen (axe@biobase.dk) | 0.41 | 2.44 | 0.000209957 | 0           |
| 263982_at   | At2g42860 | hypothetical protein predicted by genefinder;supported by full-length cDNA: Ceres:42863.                                              | 0.41 | 2.43 | 0.002423676 | 7.7801E-177 |
| 264494_at   | At1g27470 | hypothetical protein predicted by genefinder                                                                                          | 0.41 | 2.43 | 1.0398E-06  | 0           |
| 254506_at   | At4g20140 | leucine rich repeat-like protein Cf-2.2, Lycopersicon pimpinellifolium, PIR:T10515                                                    | 0.41 | 2.42 | 0.000387724 | 0           |
| 255751_at   | At1g31950 | terpene synthase family protein, putative contains Pfam profile: PF01397: Terpene synthase family                                     | 0.42 | 2.41 | 0.005784567 | 2.3379E-44  |
| 263979_at   | At2g42840 | En/Spm-like transposon protein related to En/Spm transposon family of maize;supported by full-length cDNA: Ceres:41214.               | 0.42 | 2.40 | 0.001817486 | 0           |
| 260091_at   | At1g73290 | putative serine carboxypeptidase similar to serine carboxypeptidase I precursor GB:P07519 [Hordeum vulgare]                           | 0.42 | 2.40 | 0.000824163 | 0           |
| 261729_s_at | At1g47840 | hexokinase, putative similar to hexokinase 2 GB:AAB49911 GI:1899025 from [Arabidopsis thaliana]                                       | 0.42 | 2.39 | 0.002099743 | 9.94E-273   |
| 246241_at   | At4g37050 | patatin-like protein                                                                                                                  | 0.42 | 2.39 | 0.000401979 | 0           |
| 258108_at   | At3g23570 | unknown protein contains Pfam profile: PF01738 diene lactone hydrolase family;                                                        | 0.42 | 2.38 | 0.001185423 | 0           |
| 265454_at   | At2g46530 | putative ARF1 family auxin responsive transcription factor                                                                            | 0.42 | 2.38 | 4.81802E-05 | 0           |

|             |           |                                                                                                                                     |      |      |             |             |
|-------------|-----------|-------------------------------------------------------------------------------------------------------------------------------------|------|------|-------------|-------------|
| 260957_at   | At1g06080 | delta 9 desaturase identical to delta 9 desaturase GB:BAA25180 GI:2970034 from [Arabidopsis thaliana]                               | 0.42 | 2.37 | 0.000796392 | 0           |
| 266824_at   | At2g22800 | homeodomain transcription factor (HAT9) identical to GB:U09341; supported by cDNA:<br>gi_527638_gb_U09341.1_ATU09341                | 0.42 | 2.37 | 0.000325535 | 0           |
| 255007_at   | At4g10020 | putative oxidoreductase 11beta-hydroxysteroid dehydrogenase (EC 1.1.1.146) 1 - mouse, PIR1:I56604                                   | 0.42 | 2.35 | 4.11486E-05 | 0           |
| 256452_at   | At1g75240 | hypothetical protein predicted by genemark.hmm                                                                                      | 0.43 | 2.35 | 0.008185277 | 5.3907E-179 |
| 258200_at   | At3g13900 | putative ATPase similar to ATPase II GB:AAD34706 from [Homo sapiens]                                                                | 0.43 | 2.35 | 0.00338429  | 7.7959E-168 |
| 254447_at   | At4g20860 | berberine bridge enzyme - like protein ; supported by cDNA: gi_14194126_gb_AF367269.1_AF367269                                      | 0.43 | 2.35 | 0.000618687 | 0           |
| 265246_at   | At2g43050 | putative pectinesterase                                                                                                             | 0.43 | 2.34 | 9.92981E-06 | 0           |
| 249866_at   | At5g23010 | 2-isopropylmalate synthase-like; homocitrate synthase-like ; supported by cDNA:<br>gi_12330688_gb_AF327648.1_AF327648               | 0.43 | 2.34 | 0.0015035   | 0           |
| 266391_at   | At2g41290 | putative strictosidine synthase identical to GB:AF076979; involved in alkaloid biosynthesis                                         | 0.43 | 2.34 | 2.81029E-05 | 0           |
| 264557_at   | At1g09550 | putative pectinacetyltransferase precursor similar to Vigna radiata pectinacetyltransferase precursor, gi 1431629                   | 0.43 | 2.34 | 0.000223893 | 0           |
| 248096_at   | At5g55240 | embryo-specific protein 1; Ca2+-binding EF-hand protein-like                                                                        | 0.43 | 2.33 | 0.00279472  | 3.83397E-29 |
| 267053_s_at | At2g38390 | peroxidase                                                                                                                          | 0.43 | 2.32 | 0.003143035 | 3.7516E-106 |
| 264973_at   | At1g27040 | nitrate transporter, putative nitrate transporter NTL1 GB:AAC28086 GI:3377517 from [Arabidopsis thaliana]                           | 0.43 | 2.32 | 0.000503995 | 0           |
| 247324_at   | At5g64190 | putative protein strong similarity to unknown protein (gb AAD25673.1)                                                               | 0.43 | 2.31 | 0.00073022  | 0           |
| 257102_at   | At3g25050 | endoxyloglucan transferase, putative similar to GB:C49539 from [Arabidopsis thaliana] (J. Biol. Chem. 268 (34), 25364-25368 (1993)) | 0.43 | 2.31 | 0.001863255 | 0           |
| 253513_at   | At4g31760 | peroxidase - like protein peroxidase, Spinacia oleracea, PID:g1781338                                                               | 0.43 | 2.31 | 0.000692576 | 0           |
| 245889_at   | At5g09480 | PEE-rich protein ;supported by full-length cDNA: Ceres:20407.                                                                       | 0.43 | 2.31 | 0.000276025 | 0           |
| 255575_at   | At4g01430 | predicted protein of unknown function similar to F3D13.3 similar to M. truncatula MtN21, GenBank accession number Y15293            | 0.43 | 2.31 | 0.000465794 | 0           |
| 266654_at   | At2g25890 | putative oleosin protein                                                                                                            | 0.43 | 2.31 | 0.002449267 | 2.29299E-50 |
| 246550_at   | At5g14920 | putative protein predicted protein, Arabidopsis thaliana;supported by full-length cDNA: Ceres:32599.                                | 0.43 | 2.30 | 0.000419519 | 0           |
| 258498_at   | At3g02480 | unknown protein similar to pollen coat protein GB:CAA63531 from [Brassica oleracea]                                                 | 0.44 | 2.30 | 0.002314845 | 5.0684E-204 |

|             |           |                                                                                                                                                                   |      |      |             |             |
|-------------|-----------|-------------------------------------------------------------------------------------------------------------------------------------------------------------------|------|------|-------------|-------------|
| 250794_at   | At5g05270 | putative protein contains similarity to chalcone-flavonone isomerase (chalcone isomerase)supported by full-length cDNA: Ceres:40439.                              | 0.44 | 2.29 | 1.29192E-05 | 0           |
| 263175_at   | At1g05510 | hypothetical protein similar to unknown protein GI:4105683 from (Oryza sativa)                                                                                    | 0.44 | 2.28 | 2.13484E-05 | 0           |
| 247610_at   | At5g60630 | putative protein predicted protein, Arabidopsis thaliana                                                                                                          | 0.44 | 2.28 | 6.58569E-06 | 0           |
| 266770_at   | At2g03090 | putative expansin Experimental evidence from Dr. Daniel Cosgrove at Penn State Univ. <dCosgrove@psu.edu>                                                          | 0.44 | 2.28 | 0.000252669 | 0           |
| 248545_at   | At5g50260 | cysteine proteinase similar to cysteine endopeptidase precursor CysEP GI:2944446 from [Ricinus communis]                                                          | 0.44 | 2.27 | 0.000135066 | 0           |
| 256599_at   | At3g14760 | hypothetical protein predicted by genscan+                                                                                                                        | 0.44 | 2.27 | 1.70862E-05 | 0           |
| 262525_at   | At1g17060 | putative cytochrome P450 41% identical to Cytochrome P450 [Catharanthus roseus] (gi 404690)                                                                       | 0.44 | 2.27 | 1.90265E-05 | 0           |
| 252054_at   | At3g52540 | hypothetical protein ;supported by full-length cDNA: Ceres:99326.                                                                                                 | 0.44 | 2.27 | 0.001032408 | 0           |
| 264891_at   | At1g23200 | putative pectinesterase similar to GB:AAB57669, location of EST gb Z35063 and gb Z35062                                                                           | 0.44 | 2.26 | 0.000107861 | 0           |
| 249881_at   | At5g23190 | cytochrome P450-like protein                                                                                                                                      | 0.44 | 2.25 | 0.001618102 | 0           |
| 264590_at   | At2g17710 | unknown protein ;supported by full-length cDNA: Ceres:1011.                                                                                                       | 0.45 | 2.24 | 2.0599E-07  | 0           |
| 255730_at   | At1g25460 | dihydroflavonol 4-reductase, putative similar to dihydroflavonol 4-reductase GI:1332411 from [Rosa hybrida]                                                       | 0.45 | 2.24 | 0.001046227 | 0           |
| 259812_at   | At1g49840 | unknown protein                                                                                                                                                   | 0.45 | 2.24 | 0.000684867 | 0           |
| 252312_at   | At3g49380 | hypothetical protein SF16 protein, Helianthus annuus, gb:AAD12670                                                                                                 | 0.45 | 2.23 | 0.000568127 | 0           |
| 266379_at   | At2g14690 | 1,4-beta-xylan endohydrolase                                                                                                                                      | 0.45 | 2.23 | 0.000660843 | 0           |
| 267337_at   | At2g39980 | putative anthocyanin 5-aromatic acyltransferase ; supported by cDNA: gi_13937225_gb_AF372968.1_AF372968                                                           | 0.45 | 2.23 | 0.00032598  | 0           |
| 245577_at   | At4g14780 | kinase like protein                                                                                                                                               | 0.45 | 2.23 | 7.43883E-06 | 0           |
| 266198_at   | At2g38890 | unknown protein predicted by genscan and genefinder                                                                                                               | 0.45 | 2.21 | 0.002562738 | 3.17897E-79 |
| 262733_s_at | At1g28670 | lipase identical to lipase GB:AAA93262 GI:1145627 [Arabidopsis thaliana] (FEBS Lett. 377 (3), 475-480 (1995)); supported by cDNA: gi_1145626_gb_U38916.1_ATU38916 | 0.45 | 2.21 | 0.00133031  | 1.5412E-223 |
| 263909_at   | At2g36490 | hypothetical protein predicted by genscan                                                                                                                         | 0.45 | 2.20 | 1.26895E-05 | 0           |

|             |           |                                                                                                                                                       |      |      |             |             |
|-------------|-----------|-------------------------------------------------------------------------------------------------------------------------------------------------------|------|------|-------------|-------------|
| 247953_at   | At5g57260 | cytochrome P450                                                                                                                                       | 0.46 | 2.19 | 0.01595322  | 7.11029E-30 |
| 261103_s_at | At1g62900 | O-methyltransferase 1, putative similar to GB:AAB96879 from [Arabidopsis thaliana] (Biochim. Biophys. Acta 1353 (3), 199-202 (1997))                  | 0.46 | 2.19 | 0.000214119 | 0           |
| 248468_at   | At5g50750 | UDP-glucose:protein transglucosylase; reversibly glycosylated polypeptide ; supported by cDNA: gi_14326033_gb_AF329280.1_AF329280                     | 0.46 | 2.18 | 0.000525874 | 0           |
| 265789_at   | At2g01210 | putative receptor-like protein kinase                                                                                                                 | 0.46 | 2.18 | 0.00011377  | 0           |
| 250611_at   | At5g07200 | gibberellin 20-oxidase                                                                                                                                | 0.46 | 2.18 | 2.92566E-05 | 0           |
| 247780_at   | At5g58770 | dehydrodolicyl diphosphate - like protein dehydrodolicyl diphosphate, Arabidopsis thaliana, EMBL:ATH277136                                            | 0.46 | 2.17 | 0.000809376 | 0           |
| 255814_at   | At1g19900 | unknown protein                                                                                                                                       | 0.46 | 2.17 | 0.003116764 | 7.69844E-29 |
| 261502_at   | At1g14440 | hypothetical protein predicted by genemark.hmm                                                                                                        | 0.46 | 2.15 | 0.000713814 | 0           |
| 253099_s_at | At4g37530 | peroxidase - like protein peroxidase, Arabidopsis thaliana, gb:X98314                                                                                 | 0.47 | 2.15 | 0.000294344 | 0           |
| 253346_at   | At4g33600 | hypothetical protein                                                                                                                                  | 0.47 | 2.14 | 0.000675726 | 0           |
| 258727_at   | At3g11930 | ethylene-responsive protein, putative similar to ER6 protein GB:AAD46412 GI:5669654 from (Lycopersicon esculentum)                                    | 0.47 | 2.13 | 0.000168262 | 0           |
| 256245_at   | At3g12580 | heat shock protein 70 identical to heat shock protein 70 GB:CAA05547 GI:3962377 [Arabidopsis thaliana]; supported by cDNA: gi_15809831_gb_AY054183.1_ | 0.47 | 2.13 | 0.000329244 | 0           |
| 249289_at   | At5g41040 | N-hydroxycinnamoyl/benzoyltransferase-like protein ; supported by cDNA: gi_14334525_gb_AY034954.1_                                                    | 0.47 | 2.13 | 0.000944099 | 0           |
| 266322_at   | At2g46690 | putative auxin-regulated protein                                                                                                                      | 0.47 | 2.13 | 0.0058712   | 1.69402E-20 |
| 265615_at   | At2g25450 | putative dioxygenase ; supported by cDNA: gi_15292706_gb_AY050787.1_                                                                                  | 0.47 | 2.11 | 0.001419165 | 1.0314E-227 |
| 263734_at   | At1g60030 | permease, putative similar to permease 1 GI:7844006 from [Zea mays]                                                                                   | 0.47 | 2.11 | 0.000802591 | 0           |
| 262828_at   | At1g14950 | major latex protein type1 identical to major latex protein type1 GB:CAA63026 GI:1107493 [Arabidopsis thaliana]                                        | 0.48 | 2.10 | 0.000174781 | 0           |
| 251293_at   | At3g61930 | hypothetical protein                                                                                                                                  | 0.48 | 2.10 | 4.0518E-05  | 0           |
| 255726_at   | At1g25530 | lysine and histidine specific transporter, putative similar to lysine and histidine specific transporter                                              | 0.48 | 2.10 | 0.000312751 | 0           |

|             |           |                                                                                                                                                                                                                          |      |      |             |             |
|-------------|-----------|--------------------------------------------------------------------------------------------------------------------------------------------------------------------------------------------------------------------------|------|------|-------------|-------------|
|             |           | GI:2576361 from [Arabidopsis thaliana]                                                                                                                                                                                   |      |      |             |             |
| 260745_at   | At1g78370 | 2,4-D inducible glutathione S-transferase, putative similar to 2,4-D inducible glutathione S-transferase                                                                                                                 | 0.48 | 2.09 | 0.001448447 | 2.3259E-278 |
|             |           | GI:2920666 from [Glycine max];                                                                                                                                                                                           |      |      |             |             |
| 245140_at   | At2g45420 | unknown protein predicted by genefinder and genscan; similar to gi2347197 AC002338                                                                                                                                       | 0.48 | 2.08 | 0.000493777 | 0           |
| 256970_at   | At3g21090 | ABC transporter, putative similar to ATP-binding cassette, sub-family G (WHITE), member 2                                                                                                                                | 0.48 | 2.08 | 0.006503832 | 1.67821E-15 |
|             |           | GB:NP_036050 from [Mus musculus]                                                                                                                                                                                         |      |      |             |             |
| 257869_at   | At3g25160 | ER lumen protein retaining receptor, putative similar to HDEL receptor required for retention of ER proteins GB:NP_009513 [Saccharomyces cerevisiae]; contains Pfam profile: PF00810 ER lumen protein retaining receptor | 0.48 | 2.08 | 9.86036E-05 | 0           |
| 247867_at   | At5g57630 | SNF1 related protein kinase-like protein ; supported by cDNA: gi_14334389_gb_AY034100.1_                                                                                                                                 | 0.48 | 2.08 | 0.008999054 | 1.7796E-104 |
| 260299_at   | At1g80330 | putative gibberellin 3 beta-hydroxylase similar to gibberellin 3 beta-hydroxylase GB:AAC83647 [Arabidopsis thaliana]                                                                                                     | 0.48 | 2.08 | 0.002056645 | 0           |
| 262478_at   | At1g11170 | hypothetical protein similar to hypothetical protein GB:AAD49998 GI:5734733 from [Arabidopsis thaliana]                                                                                                                  | 0.48 | 2.08 | 0.00100865  | 0           |
| 252645_at   | At3g44460 | bZIP transcription factor -like protein Dc3 promoter-binding factor-1, common sunflower, PIR:T12621;                                                                                                                     | 0.48 | 2.08 | 0.000740724 | 0           |
| 248494_at   | At5g50770 | putative protein contains similarity to oxidoreductase                                                                                                                                                                   | 0.48 | 2.08 | 0.001697492 | 0           |
| 249772_at   | At5g24130 | unknown protein                                                                                                                                                                                                          | 0.49 | 2.06 | 0.00171025  | 0           |
| 253145_at   | At4g35560 | hypothetical protein                                                                                                                                                                                                     | 0.49 | 2.05 | 0.000422883 | 0           |
| 264387_at   | At1g11990 | putative growth regulator protein contains similarity to axi 1 gene gb X80301 from Nicotiana tabacum                                                                                                                     | 0.49 | 2.04 | 0.000872369 | 0           |
| 258751_at   | At3g05890 | low temperature and salt responsive protein (LTI6B) identical to low temperature and salt responsive protein (LTI6B) GB:AAC97511 (Arabidopsis thaliana); supported by cDNA: gi_4325218_gb_AF122006.1_AF122006            | 0.49 | 2.03 | 0.002113697 | 0           |
| 246565_at   | At5g15530 | biotin carboxyl carrier protein precursor-like protein biotin carboxyl carrier protein (clone BP6) precursor - Brassica napus, EMBL:X90731;supported by full-length cDNA: Ceres:25607.                                   | 0.49 | 2.03 | 0.00020014  | 0           |
| 247487_at   | At5g62150 | putative protein predicted protein, Arabidopsis thaliana                                                                                                                                                                 | 0.50 | 2.02 | 0.001087691 | 0           |
| 267500_s_at | At2g45510 | putative cytochrome P450                                                                                                                                                                                                 | 0.50 | 2.02 | 0.00322842  | 0           |



---

|           |           |                                                                                                                                                             |      |      |             |             |
|-----------|-----------|-------------------------------------------------------------------------------------------------------------------------------------------------------------|------|------|-------------|-------------|
| 259442_at | At1g02310 | (1-4)-beta-mannan endohydrolase precursor, putative similar to (1-4)-beta-mannan endohydrolase precursor GI:9836826 from [ <i>Lycopersicon esculentum</i> ] | 0.50 | 2.02 | 0.000215471 | 0           |
| 249729_at | At5g24410 | 6-phosphogluconolactonase-like protein                                                                                                                      | 0.50 | 2.01 | 0.001115931 | 0           |
| 249454_at | At5g39520 | expressed protein predicted protein, <i>Synechocystis</i> sp., PIR:S77152;                                                                                  | 0.50 | 2.01 | 0.001907049 | 0           |
| 267376_at | At2g26330 | putative receptor-like protein kinase, ERECTA identical to GB:U47029 and GB:D83257;                                                                         | 0.50 | 2.01 | 0.001592232 | 0           |
| 261915_at | At1g65880 | amp-binding protein, putative similar to amp-binding protein GI:1903033 from [ <i>Brassica napus</i> ]                                                      | 0.50 | 2.01 | 0.000488471 | 0           |
| 267131_at | At2g23400 | hypothetical protein predicted by genscan                                                                                                                   | 0.50 | 2.01 | 0.039250827 | 1.63084E-90 |
| 258873_at | At3g03240 | hypothetical protein similar to unknown protein GB:AAD21437 from F2H17                                                                                      | 0.50 | 2.01 | 0.000976496 | 0           |
| 265511_at | At2g05540 | putative glycine-rich protein                                                                                                                               | 0.50 | 2.00 | 0.008072751 | 2.11653E-12 |

---

**Table S2. The primer sequences used in the present study (the corresponding restriction sites were bold)**

|                        | Prime name | The prime sequences (5'-3')                              |
|------------------------|------------|----------------------------------------------------------|
| For qRT-PCR            | qACTIN2-F  | TGTGCCAATCTACGAGGGTTT                                    |
|                        | qACTIN2-R  | TTTCCCGCTCTGCTGTTGT                                      |
|                        | qUBQ10-F   | AGGTACAGCGAGAGAAAGTAGCA                                  |
|                        | qUBQ10-R   | TAGGCATAGCGGCGAGGCGT                                     |
|                        | qCHIL-F    | AGTTCACTGCGATCGGAGTT                                     |
|                        | qCHIL-R    | TCCTCAGCCAAACGATCTCT                                     |
|                        | qTT5-F     | CATCGATCCTCTTCGCTCTC                                     |
|                        | qTT5-R     | AGGTGACACACCGTTCTTCC                                     |
|                        | qF3H-F     | TCAGATCGTTGAGGCTTGTG                                     |
|                        | qF3H-R     | ATGTCGAAACGGAGCTTGTC                                     |
|                        | qF3'H-F    | GGCACTAAGCCTCATCGAAC                                     |
|                        | qF3'H-R    | TTGGCGTCGTGTATTTTCAA                                     |
|                        | qDFR-F     | AAACGTTAGCGGAGAAAGCA                                     |
|                        | qDFR-R     | CCTCGTTCCGAGTGATAGGA                                     |
|                        | qANS-F     | CATCGTGGGTTGGTGAATAA                                     |
|                        | qANS-R     | GTCCGTGGAGGAACTTAGC                                      |
|                        | qANR-F     | GTGACCGGTCTCAAGGAAAT                                     |
|                        | qANR-R     | ACAGCAAATGTAGCGACCAG                                     |
|                        | qFLS-F     | ACCGTCATGCGTCAATTACA                                     |
|                        | qFLS-R     | TCAACGCATCACGCTTTAAC                                     |
| For protein expression | CHILBF     | AAAG <b>GATCC</b> ATGGGAACAGAGATGGTCAT ( <i>Bam</i> H I) |
|                        | CHILBF     | AAAG <b>TCGACT</b> TAGGTTAAAAGTGGGAGATT ( <i>Sal</i> I)  |
|                        | TT5BF      | TAG <b>GATCC</b> ATGTCTTCATCCAACGCCT ( <i>Bam</i> H I)   |

|                              |             |                                                  |
|------------------------------|-------------|--------------------------------------------------|
|                              | TT5BR       | TTGTCGACTCAGTTCTCTTTGGCTAGT ( <i>Sal</i> I)      |
| For plant expression         | CHILCF      | CACCATGGGAACAGAGATGGTCAT                         |
|                              | CHILR       | TTAGGTAAAACACTGCGGAGATT                          |
| For promoter activity        | CHILPF      | CACCTGGGGTGGAGTCAAGCATT                          |
|                              | CHILPR      | GAGTGTAAGACTTACTTTCTAAT                          |
| For subcellular localization | CHIL-1302-F | TTTCCATGGTAATGGGAACAGAGATGGTCAT ( <i>Nco</i> I)  |
|                              | CHIL-1302-R | TTTACTAGTGGTTAAAACACTGCGGAGATTGA ( <i>Spe</i> I) |
|                              | TT5-1302-F  | TTTCCATGGTAATGTCTTCATCCAACGCCT ( <i>Nco</i> I)   |
|                              | TT5-1302-R  | TTTACTAGTGTTCTCTTTGGCTAGTTTTT ( <i>Spe</i> I)    |
| For yeast two hybrid         | yCHIL-F     | TTTCATATGATGGGAACAGAGATGGTCAT ( <i>Nde</i> I)    |
|                              | yCHIL-R     | TTTCTGCAGTTAGGTAAAACACTGCGGAGAT ( <i>Pst</i> I)  |
|                              | yTT5-F      | TTTCATATGATGTCTTCATCCAACGCCT ( <i>Nde</i> I)     |
|                              | yTT5-R      | TTTCTCGAGTCAGTTCTCTTTGGCTAGTT ( <i>Xho</i> I)    |
